# Supplementary material for: Melatonin loaded PLGA nanoparticles effectively ameliorate the in vitro maturation of deteriorated oocytes and the cryoprotective abilities during vitrification process
Source: Royal Society of Chemistry journal article supplement (doi:10.1039/d2bm02054h), 2023-01-01
Supplement: d2bm02054h1.pdf [file d2bm02054h1.pdf]

Electronic Supplementary Material (ESI) for Biomaterials Science.

This journal is © The Royal Society of Chemistry 2022

## Supplementary Information

### **Melatonin loaded PLGA nanoparticles effectively ameliorate the in vitro maturation of deteriorated oocytes and the cryoprotective abilities during vitrification process.**

*Sujin Lee<sup>a</sup>, Hye Jin Kim<sup>a</sup>, Hui Bang Cho<sup>a</sup>, Hye-Ryoung Kim<sup>a</sup>, Sujeong Lee<sup>a</sup>, Ji-In Park<sup>a</sup>, and Keun-Hong Park<sup>a\*</sup>*

<sup>a</sup>Department of Biomedical Science, College of Life Science, CHA University, 6F, CHA Bio-Complex, 335 Pangyo-ro, Bundang-gu, Seongnam-si, 134-88, Republic of Korea

Corresponding Author:

**\*Keun-Hong Park, Ph.D.**

Professor

Department of Biomedical Science,

College of Life Science, CHA University, 6F,

CHA Bio-complex, Sampyeong-Dong, Bundang-gu,

Seongnam-si, Republic of Korea

E-mail address: [pkh0410@cha.ac.kr](mailto:pkh0410@cha.ac.kr)

**Supplementary Figures 1-7**

**Supplementary Tables 1-2**

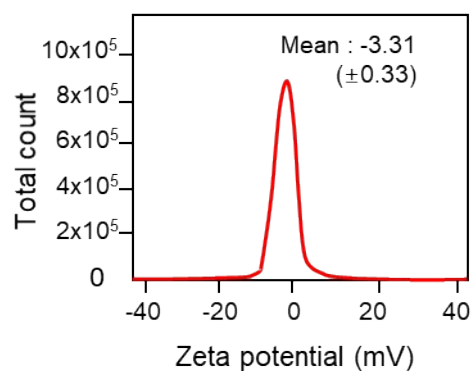

**Supplementary Figure 1. Zeta potential of melatonin/TRITC-loaded PLGA NPs; related to**

**Figure. 1 - Measurements were taken triplicate and the values represent the mean ( $\pm$  s.d.).**

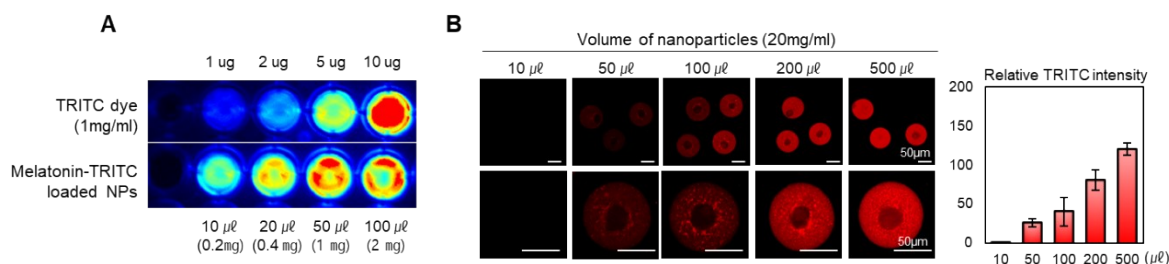

**Supplementary Figure 2. Fluorescent properties of NPs and delivered them to oocyte; related to**

**Figure. 1 – (A)** Fluorescence intensity of TRITC dye and TRITC loaded in NPs were detected using Gel Doc system and images were obtained using Image Lab software. **(B)** Confirmation of delivered NPs using loaded tracer, TRITC and quantification of fluorescence intensity by treatment concentration. Measurements were taken after 3 h of NPs treatment and performed triplicates, bars represent the mean value  $\pm$  s.d. Scale bar: 50  $\mu$ m.

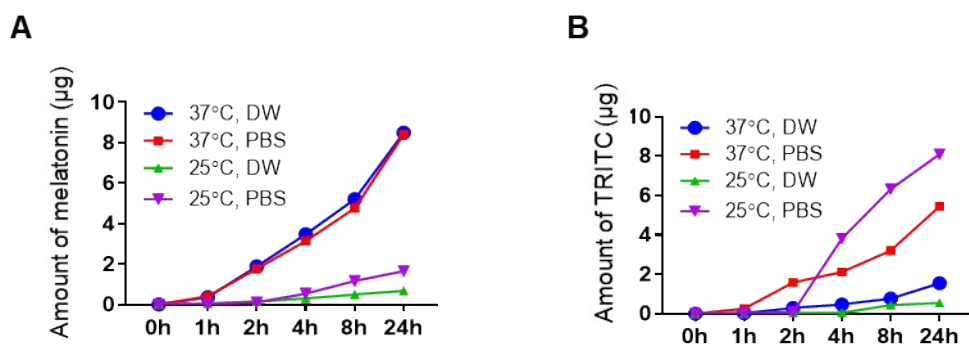

**Supplementary Figure 3. Cumulative release profiles of melatonin and TRITC by NPs**

**dispersed in PBS or DW at 25°C or 37°C; related to Figure. 1 - (A) Melatonin and (B) TRITC**

present in supernatant of NP dispersed solution were measured using microplate reader via absorbance and fluorescence, respectively. Each sample was measured n=3 replicate and symbols represent the mean value.

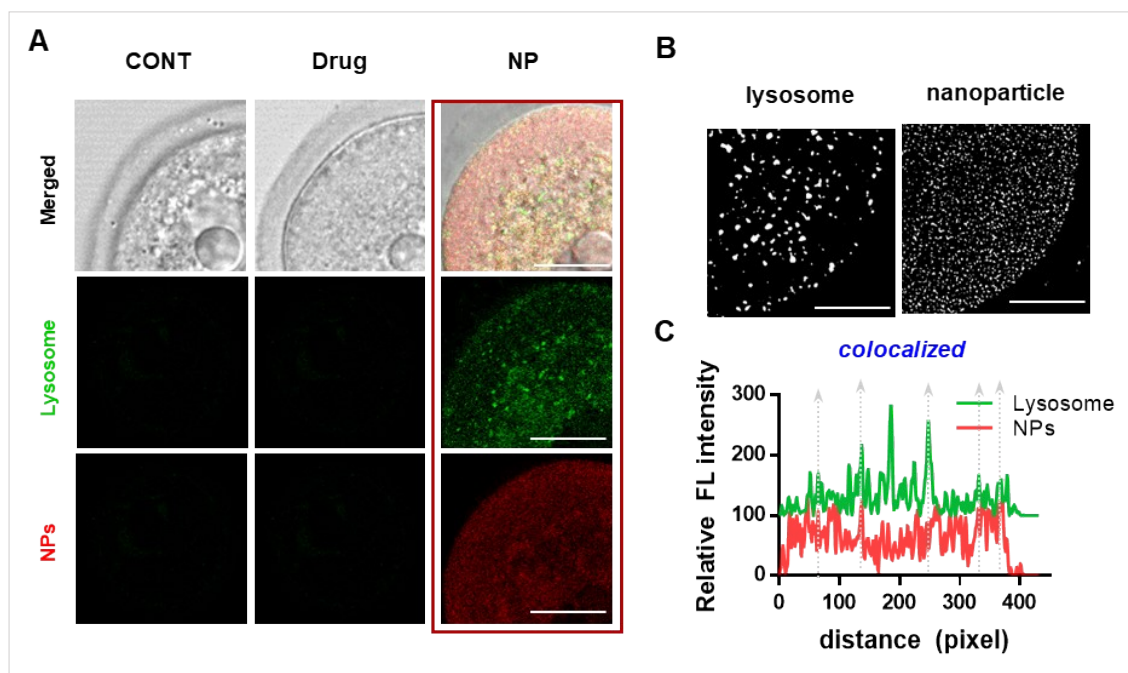

**Supplementary Figure 4. Comparison of melatonin drug and nanoparticle-mediated delivery patterns; related to Figure. 1 – (A) CLSM images of oocytes after melatonin delivery. (B) Grayscale images of lysosome and nanoparticle in NP-treated oocyte. (C) Fluorescence intensity profiling of NP-treated oocytes. Gray arrow lines indicate that colocalized region of lysosome and NPs. Scale bar: 20  $\mu\text{m}$ .**

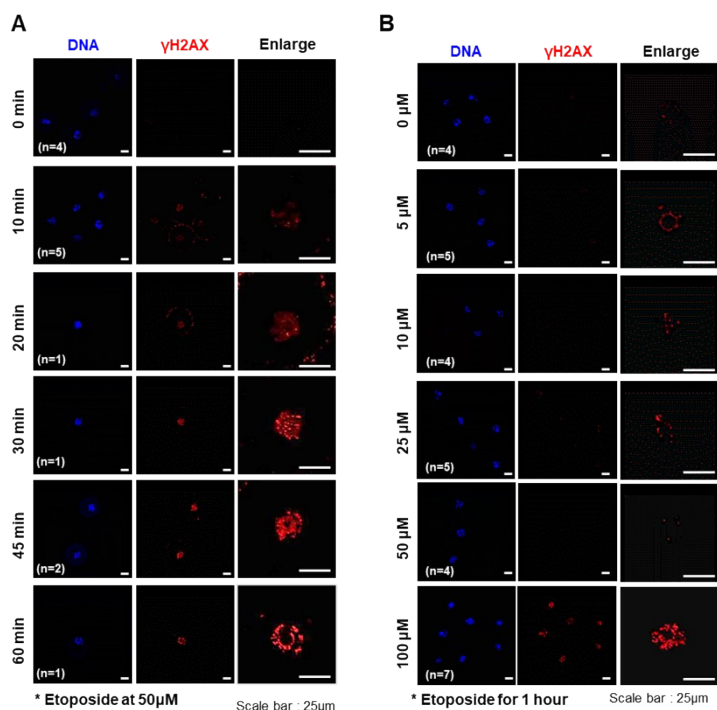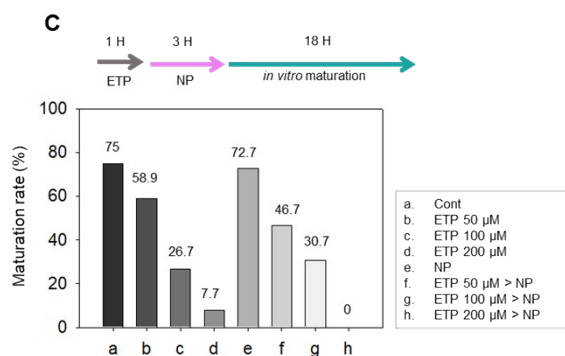

**Supplementary Figure 5. Evaluation of oocyte DNA damage degree and maturation rate according to ETP concentration and treatment time; related to Figure. 2 - (A)** Representative images after treatment ETP at 50  $\mu$ M for various duration. **(B)** Representative images after treatment ETP at various concentration for 1 h. Oocytes were labeled with DAPI (blue) and  $\gamma$ H2A.X (red, as DNA damage marker). Number(n) means the number of oocytes in the region of interest (ROI). Scale bar: 25  $\mu$ m. **(C)** Maturation rate after ETP and or NP treatment then *in vitro* maturation. Maturation rate were calculated from the ratio of the total number to the number of MII oocytes. Measurements were performed duplicate and bars represent the mean value.

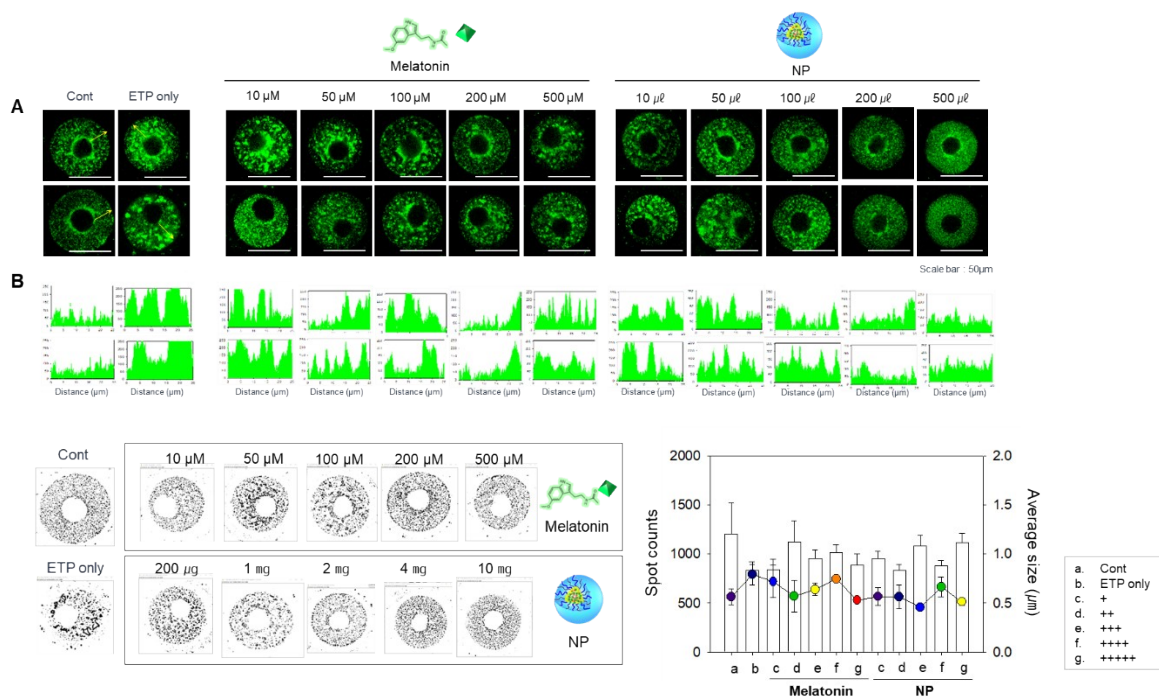

**Supplementary Figure 6. Mitochondrial distribution of oocyte and quantitative analysis after various treatment; related to Figure. 3 - (A) CLSM image of oocyte mitochondria stained with mitotracker green. Scale bar: 50 μm. (B) Fluorescence profiling graphs along the direction indicated by the yellow arrow in Cont group in A. (C) Post-processing images of MitoTracker stained oocytes converted into particle form using ImageJ. (D) Bars represent the mean value of spot counts (number of mitochondria) and the symbols are mean value of average size (mitochondrial size) ± s.d.**

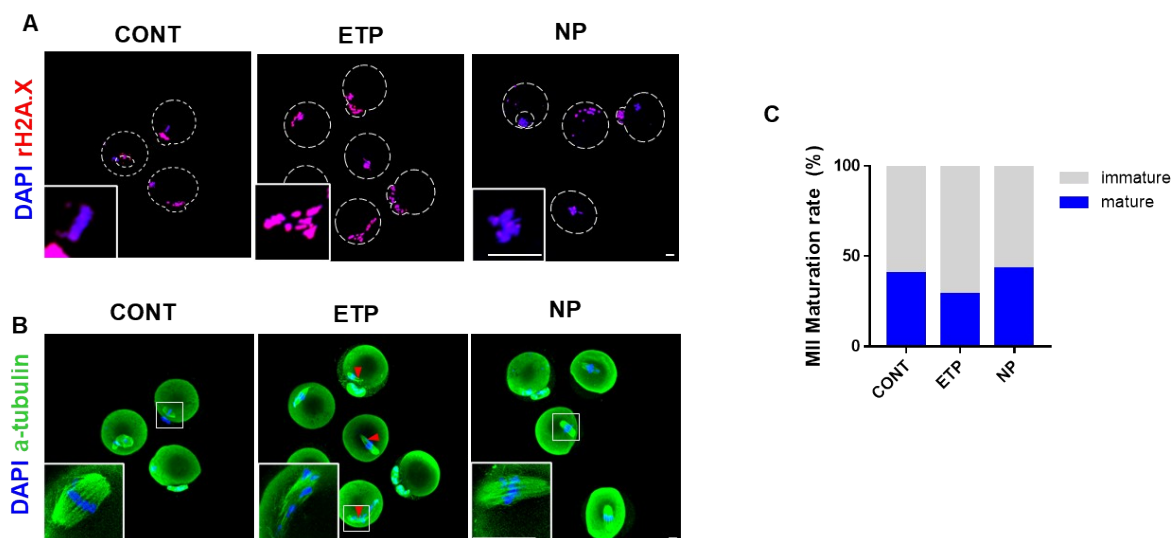

**Supplementary Figure 7. Assessment of the degree of damage of post-thaw oocyte after 1 h LN<sub>2</sub> storage; related to Figure. 5 – (A)** Detection of DNA damage by  $\gamma$ H2A.X level using CLSM. DAPI (blue) and rH2A.X (red). **(B)** Evaluation of spindle morphologies.  $\alpha$ -tubulin (green), DAPI (blue) and severe defect of spindle (red arrowhead). **(C)** Assessment of maturation of post-thaw oocytes after in vitro maturation for 16-18 h. Scale bar: 20  $\mu$ m.



|                              | Total number | Number of oocytes (no.) |         |     | Percentage of oocytes (%) |         |       |
|------------------------------|--------------|-------------------------|---------|-----|---------------------------|---------|-------|
|                              |              | GV                      | GVBD-MI | MII | GV                        | GVBD-MI | MII   |
| Control                      | 97           | 11                      | 11      | 75  | 11.34                     | 11.34   | 77.32 |
| ETP only                     | 96           | 25                      | 42      | 29  | 26.04                     | 43.75   | 30.21 |
| Single drug treatment (DS)   | 88           | 26                      | 26      | 36  | 29.55                     | 29.55   | 40.91 |
| Multiple drug treatment (DM) | 97           | 16                      | 24      | 57  | 16.49                     | 24.74   | 58.76 |
| NP                           | 71           | 13                      | 17      | 41  | 18.31                     | 23.94   | 57.75 |

**Supplementary Table 1. Number and percentage of oocytes at each maturation stage after *in vitro* maturation; related to Figure. 4 – Summary of the total number of oocytes used in the *in vitro* maturation evaluation experiment.**

| Figures      | Comparisons | P value  | P value summary | Method          |
|--------------|-------------|----------|-----------------|-----------------|
| Figure 2C(b) | Cont vs ETP | 0.000812 | ***             | Unpaired t test |
|              | Cont vs DS  | 2.76E-05 | ***             | Unpaired t test |
|              | Cont vs DM  | 0.02825  | *               | Unpaired t test |
|              | Cont vs NP  | 0.000251 | ***             | Unpaired t test |
|              | ETP vs DS   | 0.003458 | **              | Unpaired t test |
|              | ETP vs DM   | 0.00191  | **              | Unpaired t test |
|              | ETP vs NP   | 0.003062 | **              | Unpaired t test |
| Figure 2D(b) | Cont vs ETP | <0.0001  | ****            | Unpaired t test |
|              | Cont vs DS  | 0.0221   | *               | Unpaired t test |
|              | Cont vs DM  | 0.0001   | ***             | Unpaired t test |
|              | Cont vs NP  | 0.0293   | *               | Unpaired t test |
|              | ETP vs DS   | <0.0001  | ****            | Unpaired t test |
|              | ETP vs DM   | <0.0001  | ****            | Unpaired t test |
|              | ETP vs NP   | <0.0001  | ****            | Unpaired t test |
| Figure 3D    | Cont vs ETP | 0.2232   | ns              | Unpaired t test |
|              | Cont vs DS  | 0.9073   | ns              | Unpaired t test |
|              | Cont vs DM  | 0.1703   | ns              | Unpaired t test |
|              | Cont vs NP  | 0.9937   | ns              | Unpaired t test |
|              | ETP vs DS   | 0.39493  | ns              | Unpaired t test |
|              | ETP vs DM   | 0.08639  | ns              | Unpaired t test |
|              | ETP vs NP   | 0.17972  | ns              | Unpaired t test |
| Figure 3E    | Cont vs ETP | 0.319    | ns              | Unpaired t test |
|              | Cont vs DS  | 0.0856   | ns              | Unpaired t test |
|              | Cont vs DM  | 0.03182  | *               | Unpaired t test |
|              | Cont vs NP  | 0.00077  | ***             | Unpaired t test |
|              | ETP vs DS   | 0.022    | *               | Unpaired t test |
|              | ETP vs DM   | 0.00799  | **              | Unpaired t test |
|              | ETP vs NP   | 0.00017  | ***             | Unpaired t test |
| Figure 3F    | Cont vs ETP | 0.0936   | ns              | Unpaired t test |
|              | Cont vs DS  | 0.08123  | ns              | Unpaired t test |
|              | Cont vs DM  | 0.43343  | ns              | Unpaired t test |
|              | Cont vs NP  | 0.38645  | ns              | Unpaired t test |
|              | ETP vs DS   | 0.730922 | ns              | Unpaired t test |
|              | ETP vs DM   | 0.20467  | ns              | Unpaired t test |
|              | ETP vs NP   | 0.0433   | ns              | Unpaired t test |
| Figure 4C    | Cont vs ETP | 0.3203   | ns              | Unpaired t test |
|              | Cont vs DS  | 0.0713   | ns              | Unpaired t test |

|              |             |        |    |                 |
|--------------|-------------|--------|----|-----------------|
|              | Cont vs DM  | 0.1402 | ns | Unpaired t test |
|              | Cont vs NP  | 0.1288 | ns | Unpaired t test |
|              | ETP vs DS   | 0.0632 | ns | Unpaired t test |
|              | ETP vs DM   | 0.1342 | ns | Unpaired t test |
|              | ETP vs NP   | 0.125  | ns | Unpaired t test |
| Figure 4G(b) | Cont vs ETP | 0.0496 | *  | Unpaired t test |
|              | Cont vs DS  | 0.0162 | *  | Unpaired t test |
|              | Cont vs DM  | 0.5345 | ns | Unpaired t test |
|              | Cont vs NP  | 0.3829 | ns | Unpaired t test |
|              | ETP vs DS   | 0.262  | ns | Unpaired t test |
|              | ETP vs DM   | 0.2128 | ns | Unpaired t test |
|              | ETP vs NP   | 0.3719 | ns | Unpaired t test |

**Supplementary Table 2. Statistical methods and precise P values; related to Figure. 4 –**

**Summary of the p values and calculated statistical methods used to quantitative analysis.**
